# Supplementary material for: Colonization of Clostridium butyricum in Rats and Its Effect on Intestinal Microbial Composition
Source: MDPI journal article supplement (doi:10.3390/microorganisms9081573), 2021-07-23
Supplement: s1 [file s1]

## **microorganisms**

### **Colonization of *Clostridium butyricum* in rats and its effect on intestinal microbial composition**

**Xianshu Luo, Qing Kong, Yuming Wang, Xuefeng Duan, Peng Wang, Chenman Li, Yuchen Huan**

College of Food Science and Engineering, Ocean University of China, Qingdao 266003, Shandong,  
China

**\*Correspondence:** Dr. Qing Kong, School of Food Science and Engineering, Ocean  
University of China, Qingdao. Yushan Road 5, 62 Building, Qingdao, Shandong  
266003, China

**E-mail:** kongqing@ouc.edu.cn

**Tel:** +86-532-8203-2290

**Fax:** +86-532-8203-2389

Table S1. Gavage schedule (The concentration of *C. butyricum* solution was  $10^8$  cfu/ml; and  $3 \times 10^8$  CFU *C. butyricum* by gavage in rats daily)

| Group      | Gavage volume (ml/Day) | Gavage time (Days) | Time of sacrificing (Days)     |
|------------|------------------------|--------------------|--------------------------------|
|            |                        |                    | (stopping gavage to sacrifice) |
| A          | 3                      | 7                  | 6                              |
| B          | 3                      | 7                  | 4                              |
| C          | 3                      | 7                  | 2                              |
| D          | 3                      | 7                  | 1                              |
| E          | 3                      | 7                  | 0.5                            |
| F(Control) | 3                      | 7                  | 0                              |

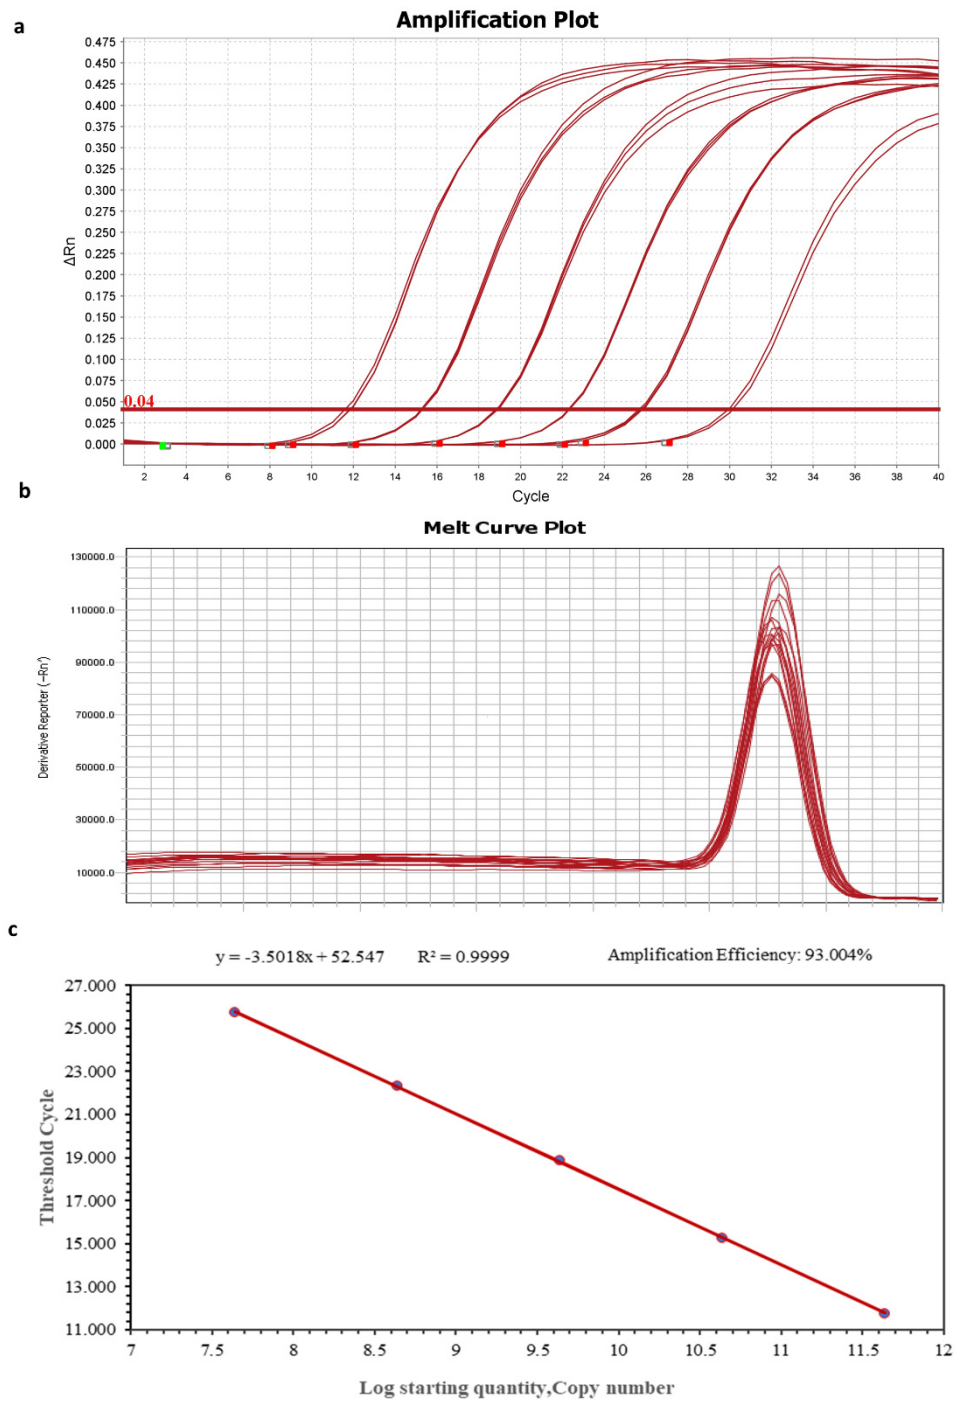

**Figure S1.** Preparation of standard curve. (A) PCR amplification curve of pure cultured *C. butyricum* genomic DNA after dilution using tenfold dilution method. (B) Melt curve plot of the standard curve. (C) Copy number logarithm of *C. butyricum* genomic DNA with the number of threshold cycles to establish the standard curve, amplification efficiency: 93.004%.
